# Supplementary material for: Machine-learning-guided quantitative delineation of cell morphological features and responses to nanomaterials
Source: Royal Society of Chemistry journal article supplement (doi:10.1039/d4nr02466d), 2024-01-01
Supplement: d4nr02466d1.pdf [file d4nr02466d1.pdf]

## Supplementary Information

### Machine-Learning-Guided Quantitative Delineation of Cell Morphological Features and Responses to Nanomaterials

Kenry<sup>1,2,3,\*</sup>

<sup>1</sup>Department of Pharmacology and Toxicology, R. Ken Coit College of Pharmacy, University of  
Arizona, Tucson, AZ 85721, USA

<sup>2</sup>University of Arizona Cancer Center, University of Arizona, Tucson, AZ 85721, USA

<sup>3</sup>BIO5 Institute, University of Arizona, Tucson, AZ 85721, USA

\*Email: [kenry@arizona.edu](mailto:kenry@arizona.edu)

## Supporting Figures

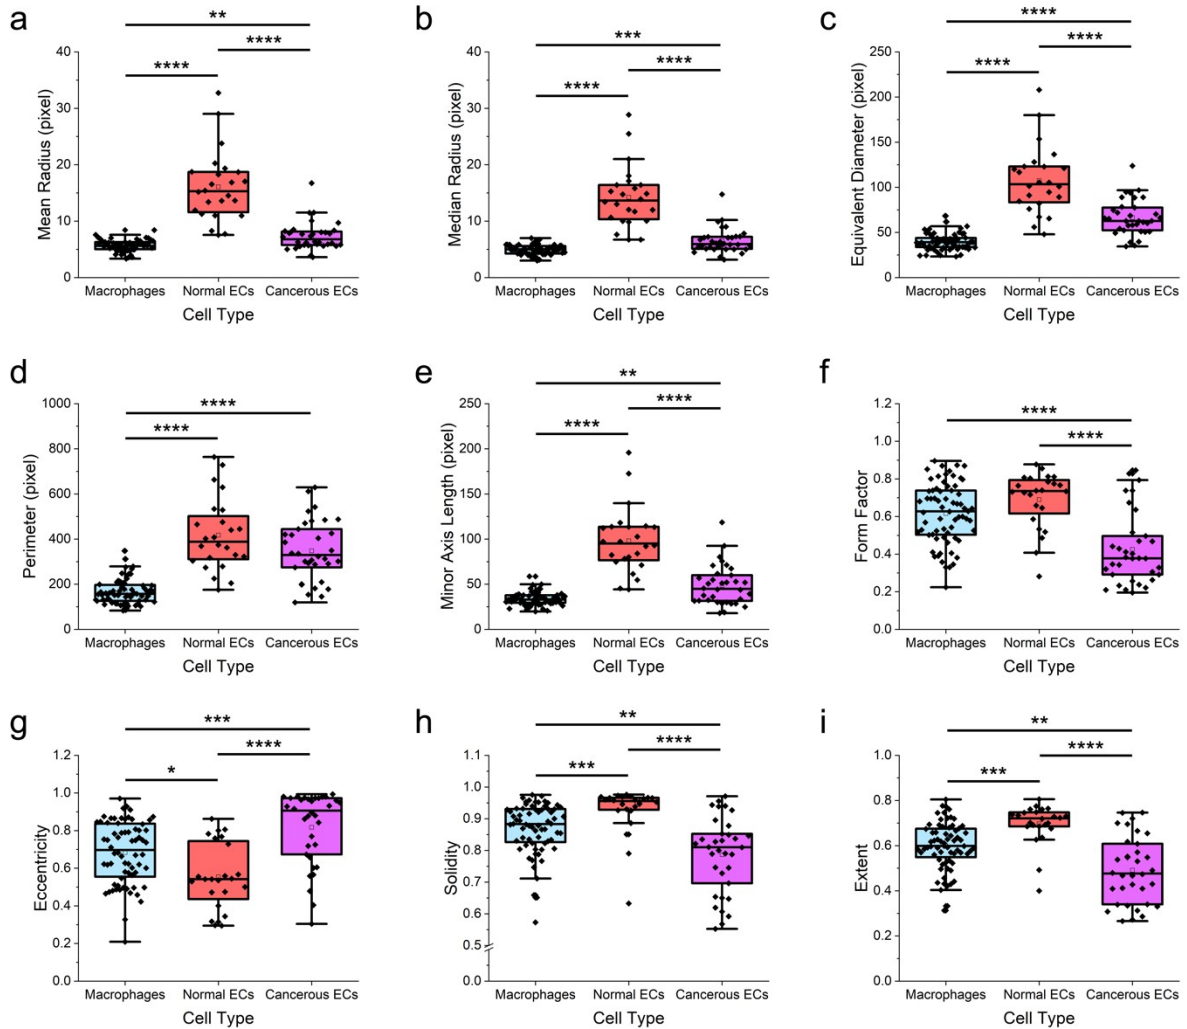

**Figure S1.** Morphological features of macrophages and epithelial cells: (a) mean radius, (b) median radius, (c) equivalent diameter, (d) perimeter, (e) minor axis length, (f) form factor, (g) eccentricity, (h) solidity, and (i) extent.  $n = 68$  for RAW 264.7 macrophages, 24 for MCF-10A normal epithelial cells, and 34 for MDA-MB-231 cancerous epithelial cells. \*  $p < 0.05$ , \*\*  $p < 0.01$ , \*\*\*  $p < 0.001$ , \*\*\*\*  $p < 0.0001$  based on either Brown-Forsythe and Welch ANOVA test coupled with Dunnett's T3 multiple comparisons test or Kruskal-Wallis test coupled with Dunn's multiple comparisons test.

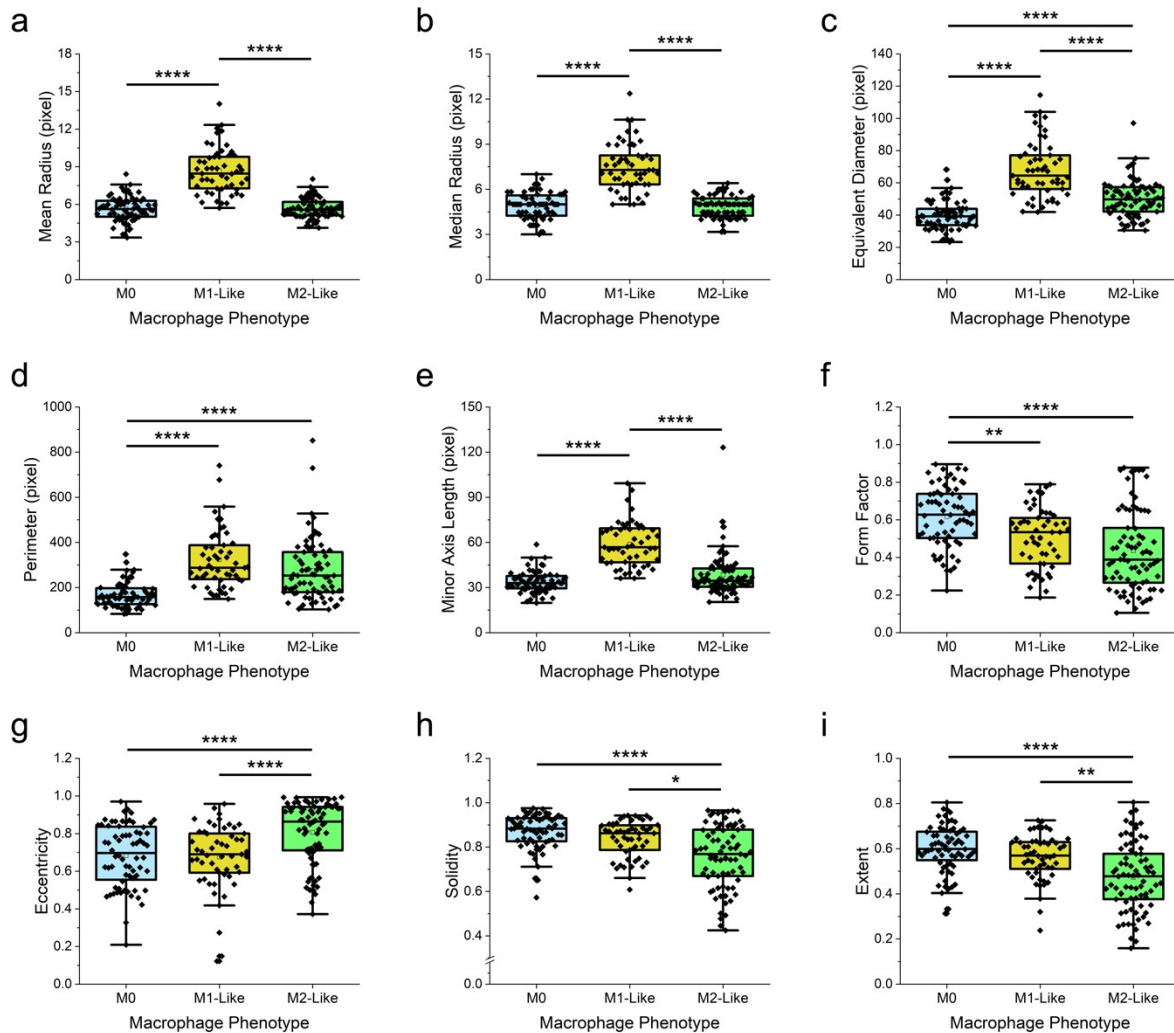

**Figure S2.** Morphological features of the different macrophage phenotypes: (a) mean radius, (b) median radius, (c) equivalent diameter, (d) perimeter, (e) minor axis length, (f) form factor, (g) eccentricity, (h) solidity, and (i) extent.  $n = 68$  for M0, 53 for M1-like, and 77 for M2-like macrophages. \*  $p < 0.05$ , \*\*  $p < 0.01$ , and \*\*\*\*  $p < 0.0001$  based on either Brown-Forsythe and Welch ANOVA test coupled with Dunnett's T3 multiple comparisons test or Kruskal-Wallis test coupled with Dunn's multiple comparisons test.

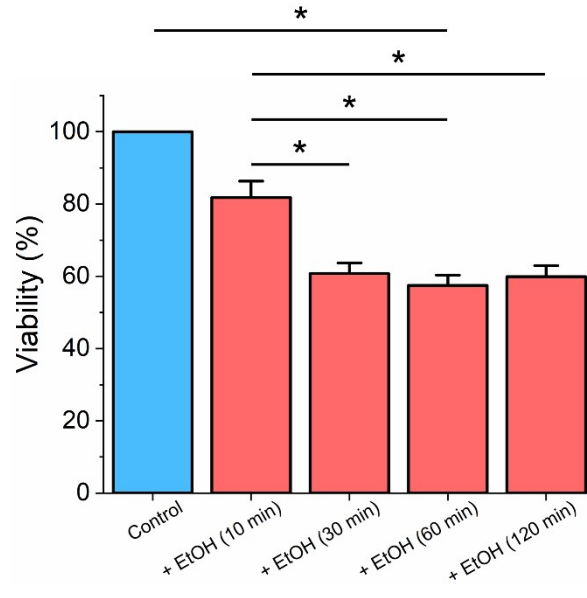

**Figure S3.** Semi-quantitative evaluation of the viability of macrophages treated with ethanol over time. \*  $p < 0.05$  based on Brown-Forsythe and Welch ANOVA test coupled with Dunnett's T3 multiple comparisons test.

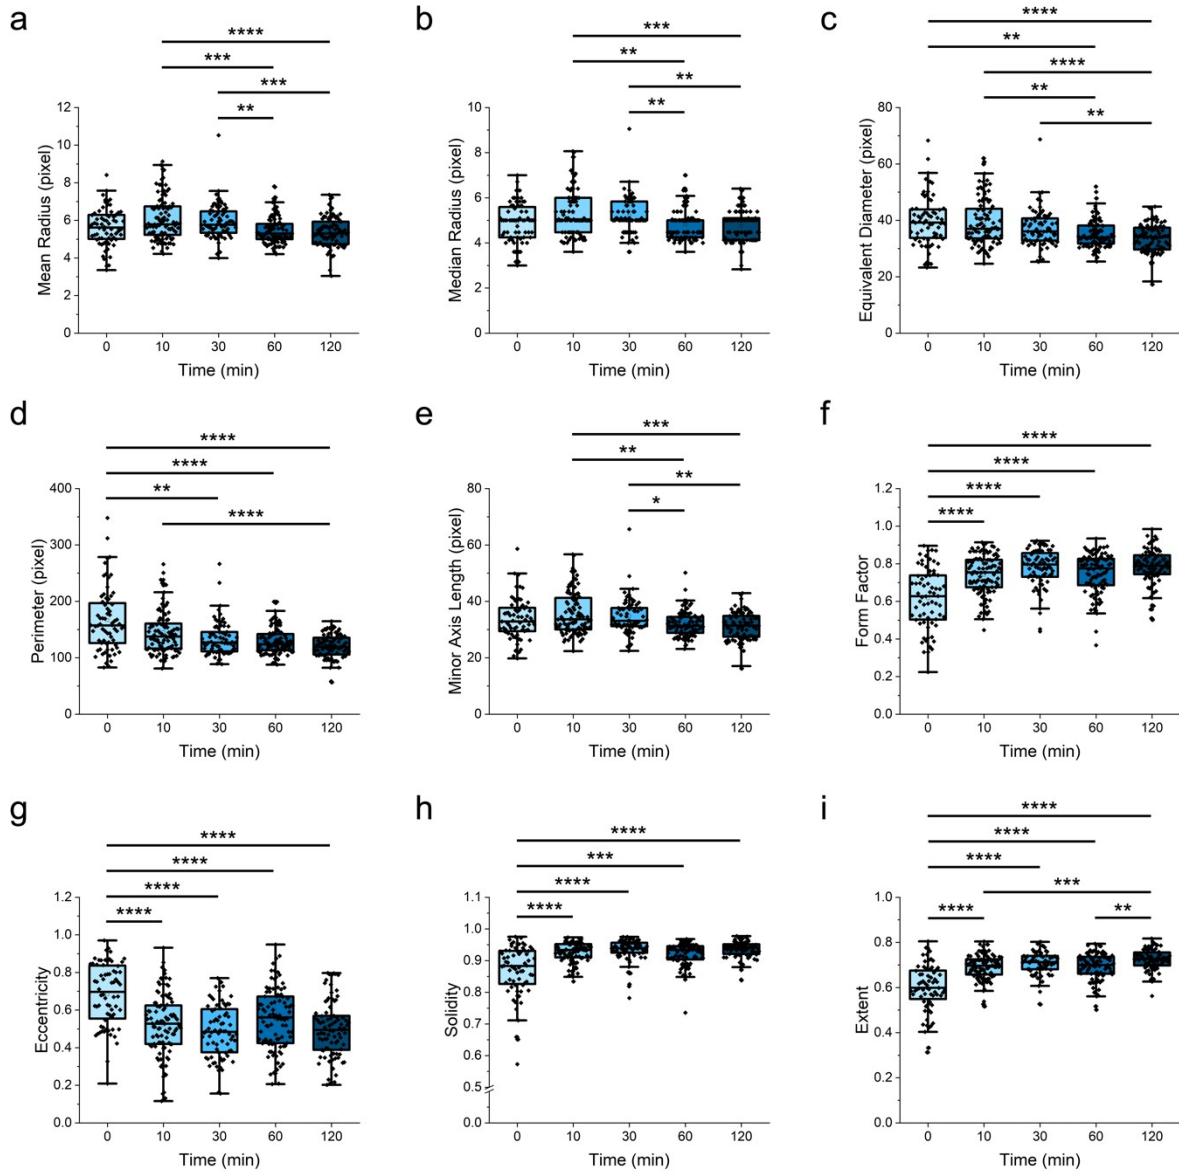

**Figure S4.** Morphological features of the different ethanol-treated macrophages with varying viability: (a) mean radius, (b) median radius, (c) equivalent diameter, (d) perimeter, (e) minor axis length, (f) form factor, (g) eccentricity, (h) solidity, and (i) extent.  $n = 68$  for control 0 min, 101 for + EtOH 10 min, 74 for + EtOH 30 min, 97 for + EtOH 60 min, and 87 for + EtOH 120 min. \*  $p < 0.05$ , \*\*  $p < 0.01$ , \*\*\*  $p < 0.001$ , and \*\*\*\*  $p < 0.0001$  based on Kruskal-Wallis test coupled with Dunn's multiple comparisons test.

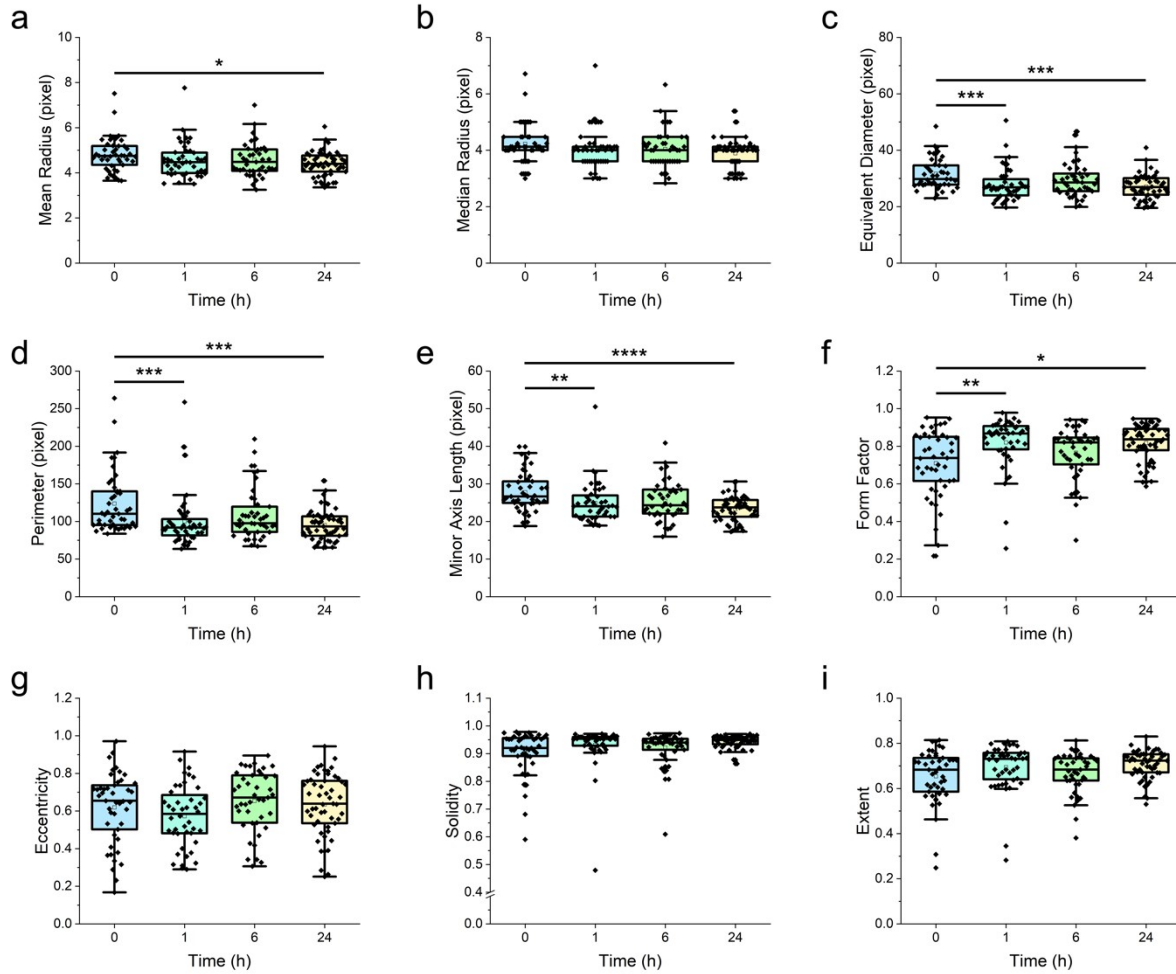

**Figure S5.** Morphological features of the different nanoparticle-treated macrophages: (a) mean radius, (b) median radius, (c) equivalent diameter, (d) perimeter, (e) minor axis length, (f) form factor, (g) eccentricity, (h) solidity, and (i) extent.  $n = 45$  for control 0 h, 44 for + Nanoparticles 1 h, 43 for + Nanoparticles 6 h, and 53 for + Nanoparticles 24 h. \*  $p < 0.05$ , \*\*  $p < 0.01$ , and \*\*\*  $p < 0.001$  based on Kruskal-Wallis test coupled with Dunn's multiple comparisons test.

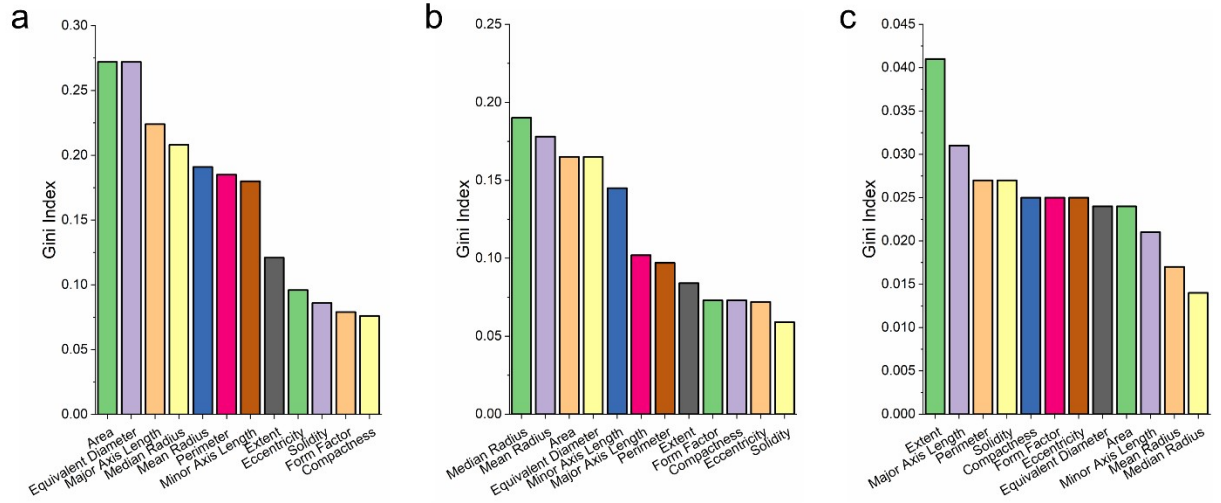

**Figure S6.** Gini index of various morphological features of (a) macrophages and normal and cancerous epithelial cells, (b) different macrophage phenotypes, and (c) ethanol-treated macrophages with varying viability.

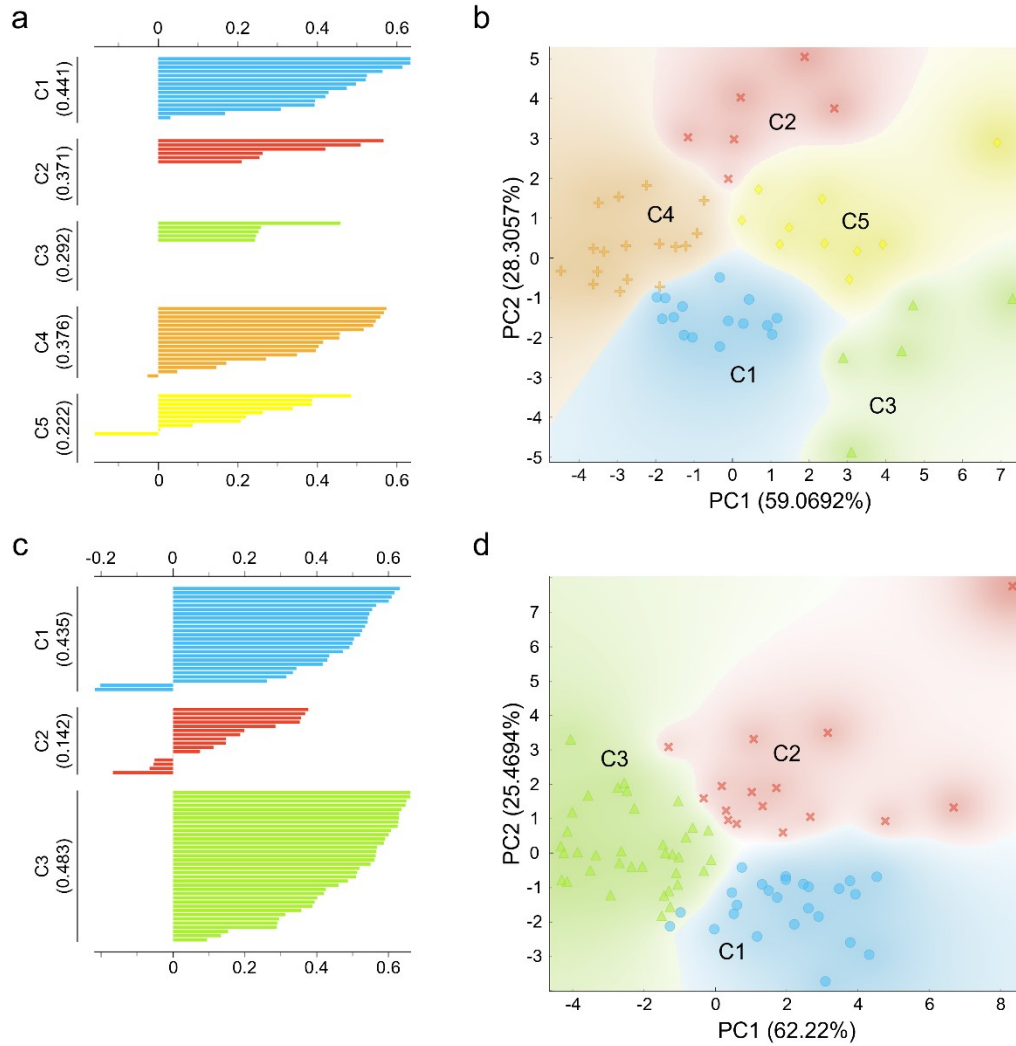

**Figure S7.** Unsupervised *k*-means clustering of the different macrophage phenotypes: (a, b) M1-like and (c, d) M2-like macrophages. (a, c) Silhouette plots and (b, d) scattering plots of the different macrophage clusters of the respective groups as identified through the unsupervised *k*-means clustering.
